# Supplementary material
Source: Elsevier journal article supplement (https://www.sciencedirect.com/science/article/pii/S0213911120301801)
Supplement: mmc1 [file S0213911120301801:mmc1.doc]

**Apéndice**

**Bibliografía específica de Atlas de Salud Mental**

Estos documentos técnicos pueden ser consultados en la página web de la Asociación Científica Psicost (<https://psicost.org/category/publicaciones/>) y en la página web de la Research School of Population Health de la Australian National University (<https://rsph.anu.edu.au/research/projects/atlas-mental-health-care>).

| **Catálogos estandarizados de servicios de salud mental y dependencia funcional en España** | |
| --- | --- |
| Cádiz | Romero C, Salvador L, Poole M, et al. Catálogo Estandarizado de Servicios para Personas con Discapacidad de la Provincia de Cádiz. Cabra: Asociación Científica Psicost; 2004. |
| Navarra | Salvador‐Carulla L, Poole Quintana M, Romero Lopez-Alberca C. Aplicación del instrumento DESDE para la Descripción Estandarizada y Comparación de Servicios de Discapacidad en áreas geográficas definidas de la Comunidad Foral de Navarra - DESDE Navarra. Pamplona; 2004. |
| Castilla-La Mancha | Salvador-Carulla L, Poole Quintana M, Romero López-Alberca C. Aplicación del instrumento DESDE para la Descripción Estandarizada y comparación de Servicios de Discapacidad en áreas geográficas definidas de la Comunidad de Castilla-La Mancha - DESDE Castilla-La Mancha. Toledo; 2005. |
| Madrid | Poole Quintana M, Romero López-Alberca C, Salvador-Carulla L, et al. Aplicación del instrumento DESDE para la descripción estandarizada y comparación de servicios de discapacidad en áreas geográficas definidas en la Comunidad de Madrid - Proyecto DESDE-Madrid. Madrid; 2006. |
| Murcia | Poole Quintana M, Romero López-Alberca C, Salinas-Pérez JA, et al. Catálogo Avanzado de Servicios para personas en situación de Dependencia de la Región de Murcia - DESDEP Murcia. Murcia; 2008. |
| **Atlas Integrales de Salud Mental en España** | |
| Andalucía | Cumbrera M, Salinas Pérez JA. Almenara Barrios J, et al. Atlas de Salud Mental de Andalucía 2005. Servicio Andaluz de Salud. Sevilla: Servicio Andaluz de Salud; 2007. |
| Cataluña | Salvador-Carulla L, Salvador-Carulla L, Romero C, et al. Disponibilidad y uso de servicios de salud mental en Catalunya: estudio comparativo con tres comunidades autónomas. Barcelona; 2003.  Salinas Pérez JA, Salvador-Carulla L. Atlas de salud mental de Catalunya 2006. Barcelona; 2009.  Salvador-Carulla L, Serrano-Blanco A, García-Alonso C, et al. Atles integral dels serveis d’atenció a la salut mental de Catalunya, 2010. Barcelona: Direcció General de Planificació i Recursos Sanitaris, Generalitat de Catalunya; 2013. |
| Cantabria | Vázquez-Barquero JL, Gaite Pindado L, Salvador-Carulla L, et al. Atlas de Salud Mental de Cantabria. Santander: Consejería de Sanidad; 2010. |
| Madrid | Crespo Hervas MD, Mur de Viu C, Salvador-Carulla L, et al. Atlas-Catálogo de Salud Mental de la Comunidad de Madrid. Madrid; 2010. |
| Ocho comunidades autónomas (Andalucía, Cantabria, Castilla-La Mancha, Cataluña, Islas Baleares, Madrid, Murcia y Navarra) | No publicado |
| Vizcaya | Pereira C, Ruiz M, Salinas JA. Atlas de Salud Mental de Bizkaia. Bilbao: Osakidetza; 2013. |
| Guipúzcoa | Iruin A, Ruiz M, Salinas JA. Atlas de Salud Mental de Gipuzkoa. San Sebastián: Unidad de Comunicación Hospital Universitario Donostia; 2013. |
| **Atlas Integrales de Salud Mental en Australia** | |
| Brisbane North | Mendoza J, Fernandez A, Hackett M, et al. The Integrated Mental Health Atlas of Brisbane North. Caloundra, Qld: ConNetica; 2015. |
| Western Sydney | Salvador-Carulla L, Fernandez A, Feng X, et al. The Integrated Mental Health Atlas of Western Sydney. Sydney: Mental Health Policy Unit, Brain and Main Research Institute, Faculty of Health Sciences, University of Sydney. Western Sydney Partners in Recovery; 2016. |
| South Western Sydney | Salvador-Carulla L, Fernandez A, Feng X, et al. The Integrated Mental Health Atlas of South Western Sydney. Sydney: Mental Health Policy Unit, Brain and Mind Centre, Faculty of Health Sciences, University of Sydney. South Western Sydney Partners in Recovery; 2016. |
| Central and Eastern Sydney | Hopman K, Furst MA, Mass C, et al. The Integrated Mental Health Atlas of the Central and Eastern Sydney PHN. Sydney: Mental Health Policy Unit. Brain and Mind Centre. Faculty of Health Sciences. University of Sydney; 2016. |
| Central and Eastern Sydney - Sydney Local Health District | Furst MA, Salinas-Perez JA, Hopman K, et al. The Integrated Mental Health Atlas of the Central and Eastern Sydney PHN Region. Annex 1: Sydney Local Health District. Sydney: Mental Health Policy Unit. Brain and Mind Centre. Faculty of Health Sciences. University of Sydney; 2016. |
| Central and Eastern Sydney - South Eastern Sydney Local Health District | Furst MA, Salinas-Perez JA, Hopman K, et al. The Integrated Mental Health Atlas of the Central and Eastern Sydney PHN Region. Annex 2: The Integrated Mental Health Atlas of the South Eastern Sydney Local Health District. Sydney: Mental Health Policy Unit. Brain and Mind Centre. Faculty of Health Sciences. University of Sydney; 2016. |
| Central and Eastern Sydney - The St Vincent’s Health Network | McGeorge P, Furst MA, Salinas-Perez JA, et al. Integrated Atlas of Mental Health Inner Sydney City. The St Vincent’s Health Network (SVHN). A nested subsystem in the Central Eastern Sydney Primary Health Network region (CESPHN). Sydney: Mental Health Policy Unit. Brain and Mind Centre. Faculty of Health Sciences. University of Sydney; 2016. |
| Far West | Salvador-Carulla L, Fernandez A, Maas C, et al. The Integrated Mental Health Atlas of the Far West. Sydney: Mental Health Policy Unit, Brain and Mind Centre, Faculty of Health Sciences. University of Sydney; 2016. |
| Dubbo and Coonamble | Hopkins J, Stretton A, McLoughlin L, et al. Integrated Chronic Care Atlas of Dubbo and Coonamble. Caloundra, Qld: ConNetica; 2016. |
| Sydney North | Salvador-Carulla L, Bell T, Furst MA, et al. The Integrated Mental Health Atlas of Sydney North PHN. Sydney: The Menzies Centre for Health Policy, University of Sydney and ConNetica; 2017. |
| Western New South Wales | Hopkins J, Salvador-Carulla L, Stretton A, et al. The Integrated Mental Health Atlas of Western NSW. Sydney: The Menzies Centre for Health Policy, University of Sydney and ConNetica; 2017. |
| Western Australia – Metropolitan Perth | Hopkins J, Wood L, Bell T, et al. The Integrated Mental Health and Alcohol and Other Drugs Atlas of Western Australia - Volume I Metropolitan Perth. Caloundra, Qld; 2017. |
| Western Australia – Country Western Australia | Hopkins J, Wood L, Bell T, et al. Integrated Atlas of Mental Health and Alcohol and Other Drugs of Western Australia - Volume II Country WA. ConNetica and Mental Health Policy Unit, Brain and Mind Centre U of SC, editor. Caloundra, Qld; 2017. |
| Eastern Melbourne | Bell T, Mendoza J, Stretton A, et al. Eastern Melbourne PHN Integrated Mental Health and AOD Service Atlas. Sunshine Coast Qld: ConNetica; 2018. |
| Australian Capital Territory | Furst MA, et al. The Integrated Mental Health Atlas of the Australian Capital Territory Primary Health Network Region. Canberra: Centre for Mental Health Research, Australian National University; 2018. |
| Kimberley | Furst MA, Reynolds J, Salinas JA, et al. Atlas of Mental Health Care of the Kimberley Region (Western Australia). Australian National University and Western Australia Primary Health Alliance (WAPHA); 2018. |
| Perth North | Furst MA, Reynolds J, Salinas JA, et al. The Integrated Atlas of Mental Health of the Perth North Primary Health Network Region. Perth; 2018. |
